# Supplementary material
Source: PubMed Central journal article supplement (PMC5672973)
Supplement: CJN.03950417SupplementaryData.pdf [file CJN.03950417SupplementaryData.pdf]

Rupal Mehta MD, Division of Nephrology and Hypertension, Department of Medicine and Center for Translational Metabolism and Health, Institute of Public Health and Medicine, Northwestern University Feinberg School of Medicine. Division of Nephrology, Department of Medicine, Jesse Brown Veterans Administration Medical Center. Chicago, Illinois

Xuan Cai MS, Center for Translational Metabolism and Health, Institute of Public Health and Medicine, Northwestern University Feinberg School of Medicine, Chicago Illinois

Alexander Hodakowski MS, Center for Translational Metabolism and Health, Institute of Public Health and Medicine, Northwestern University Feinberg School of Medicine, Chicago, Illinois

Jungwha Lee PhD, Department of Preventative Medicine, Northwestern University Feinberg School of Medicine, Chicago, IL.

Mary Leonard MD MSCE, Department of Pediatrics, Stanford University, Stanford, California

Ana Ricardo MD, Division of Nephrology and Hypertension, Department of Medicine, University of Illinois at Chicago, Chicago, Illinois

Jing Chen MD, Division of Nephrology and Hypertension, Department of Medicine, Tulane University, New Orleans, Louisiana

Lee Hamm MD, Department of Medicine, Tulane University, New Orleans, Louisiana

James Sondheimer MD, Division of Nephrology, Department of Medicine, Wayne State University, Detroit, Michigan

MirelaDobre MD, Division of Nephrology and Hypertension, Department of Medicine, University Hospitals Cleveland Medical Center, Cleveland, Ohio

Valentin David PhD, Division of Nephrology and Hypertension, Department of Medicine and Center for Translational Metabolism and Health, Institute of Public Health and Medicine, Northwestern University Feinberg School of Medicine, Chicago, Illinois

Wei Yang PhD, Department of Biostatistics, University of Pennsylvania Perelman School of Medicine, Philadelphia, Pennsylvania

Alan Go MD, Departments of Epidemiology and Biostatistics and Department of Medicine, University of California School of Medicine, San Francisco, Kaiser Permanente Northern California Division of Research, California

John W. Kusek PhD, Division of Kidney, Urologic, and Hematologic Diseases, National Institute of Health, Bethesda, Maryland

Harold Feldman MD MSCE, Departments of Epidemiology and Biostatistics, University of Pennsylvania Perelman School of Medicine, Philadelphia, Pennsylvania

Myles Wolf MD MMSc, Division of Nephrology and Hypertension, Department of Medicine, Duke University School of Medicine, Durham, North Carolina

Tamara Isakova MD MMSc, Division of Nephrology and Hypertension, Department of Medicine and Center for Translational Metabolism and Health, Institute of Public Health and Medicine, Northwestern University Feinberg School of Medicine, Chicago, Illinois
